# Supplementary material
Source: Elsevier journal article supplement (https://www.sciencedirect.com/science/article/pii/S0300289623000133)
Supplement: mmc1 [file S0300289623000133:mmc1.pdf]

# REVISIÓN

## Metabólica en la EPOC

Joaquim Gea<sup>1-3</sup>, César J. Enríquez-Rodríguez<sup>1,2</sup>, Sergi Pascual-Guardia<sup>1-3</sup>

1. Servicio de Neumología. Hospital del Mar – IMIM. Barcelona
2. Dpt. MELIS, *Universitat Pompeu Fabra*. Barcelona
3. CIBERES, ISCIII. Barcelona

Financiado en parte por: *SEPAR 2019 (Beca de proyecto) y 2021 (Bolsa de Viaje)*, *SOCAP 2021 (Bolsa de Viaje) y ISCIII (FIS PI21/00785 and M-BAE BA22/00009)*.

César J. Enríquez-Rodríguez es receptor de una ayuda Predoctoral del ISCIII (PFIS ref. FI22/00003)

**Agradecimientos:** *Al prof. Eyal Gottlieb, del Instituto de Investigación Médica Rappaport, perteneciente al Instituto Technion de Haifa (Israel) por su ayuda.*

Autor de Correspondencia: Joaquim Gea  
*Servei de Pneumologia, Hospital del Mar*  
*Pg. Marítim 27, E-08003 Barcelona*  
E-mail: [quim.gea@upf.edu](mailto:quim.gea@upf.edu)

## **Resumen** (249 palabras)

La EPOC es una enfermedad de presentación clínica heterogénea, por lo que se han intentado definir subpoblaciones de pacientes que comparten características clínicas (fenotipos y *rasgos tratables*) y/o biológicas (endotipos) entre sí, con la intención de ofrecerles una atención más personalizada. La asignación de un paciente a alguno de estos grupos requiere identificar marcadores tanto clínicos como biológicos. Respecto de los segundos, lo ideal es que sean de fácil obtención (sangre u orina), aunque su especificidad probablemente sea menor. Su identificación inicial puede ser por técnicas convencionales o más sofisticadas, aunque las segundas deberían simplificarse en el futuro para tener utilidad clínica. Las ciencias *ómicas* ofrecen una metodología que puede permitir el sondeo e identificación de buenos marcadores tanto en búsquedas dirigidas como más ciegas. En concreto la metabolómica es la ciencia que estudia los procesos biológicos a través de sus metabolitos, que pueden ser productos intermedios o finales. A través de diversas técnicas se han estudiado los metabolitos ligados tanto a la EPOC como a sus diversas especificidades fenotípicas y endotípicas. Destaca la relevancia mostrada por diversos tipos de lípidos y derivados (sobre todo fosfolípidos, aunque también ceramidas, ácidos grasos y eicosanoides), aminoácidos, factores de coagulación y componentes de ácidos nucleicos, con probables implicaciones en las funciones de estos últimos, catabolismo proteico, producción de energía, estrés oxidativo, respuesta inmuno-inflamatoria y trastornos de la coagulación. Sin embargo, falta todavía definir perfiles metabolómicos claros de la enfermedad y sus diversas circunstancias que puedan tener ya relevancia para la práctica clínica.

### *Palabras Clave*

EPOC - Fenotipos - Endotipos - Metabolitos - Fosfolípidos - Aminoácidos - Ácidos nucleicos - Coagulación

## Introducción

La Enfermedad Pulmonar Obstructiva Crónica (EPOC) es una entidad de elevada prevalencia, que comporta un elevado coste social y sanitario<sup>1,2</sup>. Su diagnóstico se basa en unos antecedentes compatibles y la presencia de obstrucción crónica en la vía aérea. Aunque parte de la semiología es relativamente común a todos los pacientes, su presentación clínica es muy heterogénea pudiendo incluir afectación tanto pulmonar como extrapulmonar. La primera de ellas a su vez, oscila entre el enfisema y la bronquitis crónica, combinados en diferentes proporciones para cada paciente. También la evolución es heterogénea, con enfermos estables a lo largo de su vida y otros con rápido deterioro. Una característica importante de la EPOC es la presencia de períodos intercurrentes de agudización de sus síntomas, denominados exacerbaciones. Éstas pueden llegar a ser graves o muy frecuentes. En la última década se ha intentado acotar diferentes poblaciones de pacientes en función de sus características clínicas. Son los llamados fenotipos o, con una consideración algo más orientada a la terapia, *rasgos tratables*. A estos fenotipos probablemente correspondan elementos fisiopatológicos diferenciados, tanto en cuanto a los factores implicados en su etiología y evolución como a los mecanismos biológicos específicos (endotipos). Estos conceptos se hallan ya recogidos en las actuales guías clínicas de la enfermedad<sup>1,2</sup>, aunque todavía no se ha conseguido profundizar lo suficiente como para poder realizar una medicina realmente personalizada, con elementos de manejo altamente preciso para cada paciente<sup>3</sup>. Este déficit contrasta con la aparición de nuevas terapias, como son los moduladores de la respuesta biológica (conocidos coloquialmente como 'fármacos biológicos'), que se hallan dirigidos a modificar los mecanismos de presentación y/o evolución de la enfermedad<sup>4</sup>.

Aunque sin duda comparten elementos comunes (p.ej. la inflamación o el estrés oxidativo), es fácil deducir que los diversos mecanismos presentes en cada paciente y su interrelación a lo largo del tiempo han de tener cierta especificidad. Esto tendría una consecuencia clínica

importante en cuanto a que conllevaría dianas terapéuticas diferenciadas. Es por tanto muy relevante averiguar qué mecanismos fisiopatológicos están presentes en cada paciente o grupo de pacientes. La obtención de marcadores tanto clínicos (p.ej. presencia y número de exacerbaciones, perfil de afectación en las técnicas de imagen o funcionales) como biológicos parece el instrumento más oportuno para identificar dichos mecanismos y asignar al paciente con EPOC a un subgrupo más específico. Dentro de los marcadores biológicos o biomarcadores, ya existe alguno que ha permitido personalizar algo más el tratamiento. Es el caso del número de eosinófilos en sangre periférica<sup>1,2</sup>. Sin embargo, faltan todavía nuevos elementos que incorporar a definiciones aún más restrictivas de fenotipos/rasgos tratables y/o endotipos. La búsqueda de nuevos biomarcadores puede realizarse de forma dirigida y basada en una hipótesis concreta, o bien de modo más ‘ciego’, con un rastreo masivo y sin hipótesis predefinida. Además de técnicas más tradicionales, en la última década se han utilizado ampliamente las denominadas ciencias y técnicas ‘ómicas’, también conocidas como de elevado rendimiento (*high-throughput*). Estas permiten sugerir y posteriormente confirmar, moléculas y vías metabólicas tanto esperables como poco exploradas previamente, con potencial obtención de biomarcadores de utilidad clínica y de moléculas-diana para nuevos tratamientos<sup>5</sup>.

## **La metabolómica**

Las diversas ciencias *ómicas* reciben su nombre del sustrato a investigar. Es el caso de la genómica, la proteómica o la metabolómica. Esta última podría definirse como el estudio de los metabolitos y la inferencia de los procesos que los generan. Un metabolito es en realidad un producto intermedio o final de dichos procesos, y constituye una pista sobre los eventos metabólicos más recientes. Se conoce como *metaboloma* el conjunto de metabolitos que existen en un organismo, tejido o líquido orgánico. Los metabolitos son en general moléculas de unos 1500 Dalton, e incluyen entre otros a aminoácidos y péptidos, componentes de los

ácidos nucleicos, glúcidos, lípidos y sustancias inorgánicas. Dado que las enfermedades como la EPOC implican cambios metabólicos en el organismo, fundamentalmente derivados del persistente estado inflamatorio y catabólico, es razonable inferir que éstos se expresarán en los correspondientes metabolitos. Por tanto, el estudio metabolómico podría ser de utilidad tanto en el diagnóstico de la enfermedad como en diferenciar sus distintos fenotipos, permitiendo un manejo más preciso y personalizado<sup>6</sup>.

Los elementos susceptibles de un estudio metabolómico en la EPOC serían por un lado los de tipo local (como el tejido pulmonar y las secreciones de las vías aéreas), y por otro los de perfil sistémico (sangre y orina). Estos últimos serían menos órgano-específicos pero de obtención mucho más sencilla, por lo que no debe extrañar que la mayoría de trabajos se hayan realizado con ellos. Las técnicas utilizadas en los análisis metabolómicos son fundamentalmente las que permiten la separación de los llamados ‘analitos’ (‘señales’) y las de identificación-cuantificación de éstos y de sus metabolitos correspondientes (tabla 1). Entre las primeras destaca la cromatografía de gases (GC), que permite separar los compuestos volátiles y otras sustancias tras realizar una derivación<sup>7</sup>. En cambio, los metabolitos hidrofílicos o ‘polares’ de gran tamaño deben explorarse con otras técnicas como la cromatografía líquida de alta presión (HPLC), cuyo espectro es más amplio que el de la GC<sup>8</sup>. Una de sus variedades es la de ‘ultra-elevado rendimiento’ (UHPLC), que posee muchas ventajas (menor cantidad de muestra, rapidez y mejor resolución). La electroforesis capilar (EC) es otra de las técnicas empleadas y se caracteriza por una gran capacidad discriminadora de los metabolitos<sup>9</sup>. Tras la separación de éstos con las técnicas mencionadas se utiliza la espectrometría de masas (MS), cuya misión será identificarlos y cuantificarlos a partir de sus analitos<sup>7</sup>. La MS también puede utilizarse como técnica única, para separarlos, identificarlos y cuantificarlos. Una variedad es la MS de ionización por electropulverización (*electrospray*) (ESI-MS), en que se genera un aerosol muy útil para la detección de iones

procedentes de macromoléculas. Por otra parte, la ya mencionada HPLC puede acoplarse a una MS denominada de ‘cuadruple tiempo de vuelo’ (QTOF). También se ha desarrollado más recientemente la espectroscopia de resonancia magnética nuclear (NMR), que permite identificar los metabolitos sin necesidad de separarlos, aunque precisa que sus proporciones sean relativamente altas<sup>10</sup>. Los resultados obtenidos con las técnicas mencionadas suelen expresarse de forma relativa, lo que permite compararlos con otras muestras del mismo estudio aunque dificulta la comparación directa con resultados externos.

## **Metabolómica y EPOC**

En la presente revisión se analizan los hallazgos más relevantes de la literatura en cuanto al metaboloma de los pacientes con EPOC. Un factor importante a tener en cuenta es que el diseño de los diversos estudios, incluyendo el tipo de muestra y las técnicas empleadas es muy variado, por lo que sólo una visión integrada puede dar una idea de lo que estos trabajos reflejan.

### *Fases iniciales de exposición*

El exposoma incluye todas las exposiciones externas e internas de un individuo desde su concepción hasta el fallecimiento. Su relación con la base genética determinaría las enfermedades, incluyendo la EPOC. En esta última es evidente la influencia del tabaco y otros contaminantes, pero también otros hábitos de vida, su inicio, el entorno, la evolución tanto del sistema inmunitario como de la microbiota, y los diversos procesos que se dan en el organismo. Las consecuencias del impacto de estos factores sobre la salud se producen dinámicamente a lo largo de toda la vida y se reflejarán en los metabolitos generados en cada momento<sup>11</sup>. Esta relación temporal cambiante entre el paciente con EPOC y su entorno podría explicar también en parte las diferentes trayectorias observadas en la enfermedad<sup>12</sup>.

Los trabajos sobre los profundos efectos de la exposición al tabaco sobre el metabolismo son numerosos, En un interesante estudio realizado en sangre de fumadores, Mastej et al. hallaron que una red formada por 13 proteínas y otros metabolitos (destacando aminoácidos y fosfolípidos) se relacionaba inversamente con la función pulmonar<sup>13</sup>, unos resultados que han sido confirmando por otros estudios<sup>14,15</sup>. Por otra parte, el fibrinógeno se ha asociado a un mayor riesgo de desarrollar una EPOC en fumadores<sup>16</sup>.

En cuanto a los cambios inducidos por el humo de leña o carbón no existen estudios metabolómicos específicos, aunque sí respecto de partículas que pueden derivar de estas exposiciones. Así, Nassan et al. observaron que la exposición a las de tamaño inferior a 2,5 µm (PM2.5), y entre ellas especialmente las denominadas ultrafinas, inducen cambios en el metabolismo de fosfolípidos y glutatión, lo que probablemente tiene implicaciones en la respuesta inflamatoria-inmune, el estrés oxidativo, y el daño y reparación de los ácidos nucleicos<sup>17</sup>. A su vez, los estudios metabolómicos de contaminación ambiental se han relacionado con el estrés oxidativo, la inflamación y el metabolismo de los esteroides en los individuos expuestos<sup>11,17-21</sup>. También interesante es que los perfiles de metabolitos ligados a la exposición ambiental parecen ser diferentes para cada sexo<sup>22</sup>. Con respecto a la EPOC se podría especular que estas sustancias podrían ser ya detectables tanto en las fases previas al desarrollo de la enfermedad como en sus fases más precoces.

### *La enfermedad pulmonar ya instaurada, aspectos generales*

Los cambios metabolómicos detectados en la EPOC por los diversos estudios, tanto de tipo dirigido (*targeted*) como no dirigido (*untargeted*), son numerosos aunque todavía poco concluyentes. Por la facilidad de su obtención y dado que es una enfermedad con numerosas manifestaciones sistémicas, la mayoría de estos estudios se ha realizado en muestras de plasma o de suero. También hay algunos estudios centrados en muestras procedentes del aparato respiratorio. En algunas de ellas no se conoce con seguridad el grado de dilución,

por lo que las comparaciones con otros estudios resultan dificultosas<sup>23</sup>. Por último, también se ha publicado algún estudio aislado en orina<sup>24-26</sup> o incluso en heces<sup>27</sup>.

A continuación se muestran los hallazgos más relevantes obtenidos en los diversos estudios metabolómicos realizados en enfermos con EPOC, para a continuación entrar en detalles relacionados con los diversos fenotipos y otras circunstancias asociadas a la enfermedad. En las tablas 2 y 3, complementadas para su mejor comprensión con la figura 1, se muestra la síntesis de resultados.

*- Muestras de origen pulmonar.*

Los estudios realizados en muestras procedentes del propio aparato respiratorio son los que mejor pueden reflejar los eventos que suceden en el pulmón y sus vías aéreas<sup>28</sup>.

*Tejido pulmonar.* Berdyshev et al., utilizando LC-MS, encontraron que los pacientes con EPOC leve o moderada mostraban niveles superiores de ceramidas que los sujetos control en su tejido pulmonar, lo que se interpretó como expresión de destrucción tisular<sup>29</sup>. Por el contrario, los pacientes con enfermedad grave mostraban mayores niveles de un esfingolípido pero menores de las mencionadas ceramidas<sup>29</sup>.

*Lavado Broncoalveolar (BAL).* Asociaciones entre la función pulmonar y tanto algunos lípidos (ácidos grasos, glicerofosfolípidos y esfingolípidos) como aminoácidos diversos y algún xenobiótico han sido reportadas en el BAL de pacientes con EPOC por Halper-Stromberg et al.<sup>28</sup>. Por otra parte, y también en el BAL, otros autores han hallado aumentos de diversos péptidos que además se asociaban al deterioro funcional<sup>30</sup>. Balgoma et al. A su vez, hallaron que lípidos relacionados con el ácido linoleico, y algunos derivados del citocromo P450 (involucrados en la síntesis de hormonas, colesterol y vitaminas) se relacionaban estrechamente con la función pulmonar y con la abundancia de células



caliciformes. Además, un panel de 9 lípidos era capaz de diferenciar entre mujeres fumadoras con o sin EPOC, aunque no mostraba utilidad en varones<sup>31</sup>.

*Espuito inducido.* En el estudio de Zhu et al. se observó que diversos metabolitos relacionados con los glicerofosfolípidos se hallaban disminuidos en el esputo de los enfermos graves, con probables repercusiones en su nivel de estrés oxidativo, ya que además esto se relacionaba inversamente con los niveles de superóxido dismutasa (SOD) y mieloperoxidasa (MPO). Estas últimas destacaban entre un total de más de 500 metabolitos expresados diferencialmente entre EPOC moderada y grave<sup>32</sup>. Por otra parte, en el trabajo de Esther et al. el esputo de los pacientes con EPOC mostró aumentos en el ácido siálico, glutatión (esencial en el balance redox), bases nitrogenadas y nucleósidos<sup>33</sup>. También destaca el estudio de Van der Does et al, que observaron niveles reducidos de ácidos grasos y sus derivados en el esputo de los pacientes con EPOC estable, con incrementos del ácido araquidónico y de mediadores de la ciclooxigenasa-2<sup>34</sup>. En el caso del ácido araquidónico parece además que su aumento depende de vías relacionadas con los esfingolípidos<sup>35</sup>, con consecuencias en la síntesis de eicosanoides. En otro interesante estudio, Yan et al. observaron alteraciones del metabolismo del triptófano en el esputo de pacientes con EPOC, debido a la reducción del ácido hidroxindolacético (metabolismo de la serotonina)<sup>36</sup>. Otras moléculas, como algunos eicosanoides (prostaglandinas, leucotrienos y tromboxanos), han mostrado niveles diferenciados en el esputo de pacientes con EPOC frente a los controles<sup>37</sup>.

*Condensado del aire exhalado.* Esta es una muestra de gran valor potencial por representar potencialmente ‘el pulmón profundo’. Sin embargo, su obtención y análisis es todavía algo dificultosa y debe avanzarse en su desarrollo, ya que presenta problemas en la determinación de las concentraciones reales de cada compuesto [lo que incluye volátiles (los que son gaseosos a temperatura ambiente) y no volátiles orgánicos, así como moléculas inorgánicas]<sup>38-40</sup>. En uno de los primeros estudios publicados, De Lurentis et al. mostraron

que los pacientes mostraban reducciones o ausencias de algunas moléculas que intervienen en el ciclo del ácido cítrico, de aminoácidos como la glutamina (síntesis de proteínas y del glutatión, además de tampón de ácidos), componentes de los glicerofosfolípidos y colina, que sí aparecían en los sanos<sup>41</sup>. Estos autores reportaron años después que pacientes y controles también se diferenciaban en otros marcadores relacionados también con el ciclo del ácido cítrico, ácidos grasos y aminoácidos<sup>42</sup>. Resultados en gran parte confirmados e incluso ampliados por Bertini et al.<sup>43</sup> y Bregy et al.<sup>44</sup>. Por su parte, Cazzola et al. analizaron diversos compuestos volátiles, obteniendo diferencias para algunos hidrocarburos, muchos de ellos del tipo aromático, y algún xenobiótico aislado entre enfermos con EPOC y controles<sup>45</sup>. Resultados muy superponibles a los reportados por Westhoff et al.<sup>46</sup> y Gaida et al.<sup>47</sup>.

*Detección en aire exhalado por nariz electrónica (eNOSE).* Esta tecnología permite identificar compuestos ligados fundamentalmente a olores. En el estudio de Rodríguez-Aguilar et al. por ejemplo, se reportó que los pacientes con EPOC tienen niveles diferenciado de los controles sanos para algunos alcoholes y su derivado acetaldehído, diversos hidrocarburos, derivados de algunos aminoácidos y para cuerpos cetónicos<sup>48</sup>.

#### *- Muestras de origen sistémico*

*Sangre.* Las muestras analizadas incluyen suero o plasma, siendo la principal diferencia entre ambos la presencia en el segundo de factores de coagulación. Con estas muestras se han realizado numerosos trabajos, algunos muy amplios y ligados a estudios multicéntricos como ECLIPSE, COSMIC, COPDGene y SPIROMICS<sup>49-52</sup>, así como otros de menor envergadura.

Un estudio muy interesante es el de Chen et al. que comparó fumadores sin la enfermedad con pacientes con EPOC, observando que los segundos mostraban hasta 23 metabolitos con concentraciones diferenciadas. Esto permitió generar un modelo de alta capacidad

predictiva, que incluía glúcidos, glicerofosfolípidos, diversos péptidos (incluyendo el B del fibrinógeno o mFBP) y productos de la oxidación de aminoácidos<sup>16</sup>.

De forma más concreta, se han objetivado cambios sanguíneos importantes en diversos lípidos. Así, algunos autores han descrito una disminución de esfingolípidos en el suero de los pacientes con EPOC, y de las ya mencionadas ceramidas en aquellos con hábito tabáquico persistente<sup>53-55</sup>. En el mismo sentido Guillenwater et al. hallaron una fuerte asociación de enfermedad con la red en que se hallaban estos dos tipos de sustancias<sup>56</sup>, observando también que tanto diglicéridos como algunos glicerofosfolípidos se hallan disminuidos en los pacientes<sup>56</sup>. Esto último se confirmó para las fosfatidilcolinas en otros estudios<sup>54,57</sup>. Por contra, otros glicerofosfolípidos y moléculas asociadas (como la fosfocolina, precursora de la fosfatidilcolina) y los triglicéridos parecen hallarse aumentados<sup>24,26,53,54,57,58</sup>. También Liu et al. (ESI-MS) evidenciaron cambios en diversos fosfolípidos, que en unos casos eran superiores y en otros inferiores en los pacientes respecto de los controles<sup>59</sup>.

En la EPOC también se hallan reducidos los ácidos grasos poliinsaturados (PUFA), aunque los monoinsaturados parecen hallarse elevados, observándose también alteraciones en los eicosanoides<sup>24,53,54</sup>. Así, Balgoma et al. observaron que los pacientes con EPOC muestran niveles séricos superiores a los controles en derivados de las oxidasas CYP y de algunos ácidos plaquetarios, procedentes a su vez del araquidónico, con disminución de la lipooxigenasa que transforma ácidos grasos en leucotrienos<sup>31</sup>.

Por otra parte, en las cohortes COPDGene y SPIROMICS se evidenció que los pacientes con EPOC muestran cambios en las acilcarnitinas (transporte de ácidos grasos a la mitocondria para su oxidación)<sup>56</sup>. Esto es similar a lo hallado también por Kim et al. y Callejon-Leblic et al. en trabajos con menor número de pacientes<sup>24,58</sup>.

Respecto del metabolismo proteico se han reportado cambios en diversos aminoácidos y derivados<sup>24,26,56,58,60-66</sup>, con disminuciones sobre todo en los de cadena ramificada<sup>26,61</sup> (más acentuadas en enfermos graves)<sup>26,62,66</sup>, y también en otros como la histidina y la creatina (esta última derivada de glicina y arginina). Sin embargo, otros aminoácidos (p.ej. arginina y fenilalanina) o sus derivados (p.ej. la histamina, que deriva de la histidina) muestran niveles superiores a los de los controles sanos<sup>26,58,60,62,64,66</sup>, sobre todo durante las exacerbaciones<sup>63</sup>. Algunos de estos cambios correlacionan además con el nivel de marcadores de inflamación sistémica<sup>60,66</sup>. En paralelo, diversos autores evidenciaron niveles mayores de algunas lipoproteínas HDL, la glicoproteína GlycA (derivada de proteínas de fase aguda) y/o cuerpos cetónicos en los enfermos con EPOC<sup>62,65,66</sup>. Finalmente, también se han hallado alteraciones en el péptido mFBP del fibrinógeno, en relación directa con la afectación funcional de los pacientes<sup>16</sup>, lo que podría explicar algunas de sus complicaciones tromboembólicas. Si todo lo mencionado se sintetiza en las vías del metabolismo proteico más relacionadas con la enfermedad, se observa que incluyen sobre todo las específicas de los aminoácidos citados y sus procesos oxidativos, lo que sugiere un catabolismo aumentado de las proteínas<sup>33,57</sup>. Finalmente, en un amplio estudio realizado por Yu et al. se hallaron hasta 17 metabolitos asociados a la EPOC, incluyendo aminoácidos y sus derivados (p. ej. ornitina, homocitrulina y carnitinas), pero también lípidos esteroideos diversos (p.ej. androsterona y colestionato, derivado del colesterol), serotonina, bases púricas y nucleósidos<sup>67</sup>. Por otro lado, Xue et al. hallaron niveles séricos elevados de maleato, piruvato y lactato en sus pacientes, lo que sugiere también problemas en el metabolismo oxidativo del ciclo de Krebs, con predominio de la glicolisis anaerobia y repercusión en la producción de energía<sup>68</sup>; algo también sugerido por los resultados de Naz et al<sup>69</sup>.

Recientemente, Godbole et al., a partir de los hallazgos comunes a diversos estudios y utilizando las cohortes de SPIROMICS y de COPDGene, han intentado generar un modelo

predictivo respecto de la afectación funcional en la EPOC. Utilizando un total de 132 metabolitos, entre los que destacaban nuevamente los relacionados con aminoácidos y lípidos, consiguieron explicar hasta un 65% de la variabilidad del FEV<sub>1</sub>. Sin embargo, estos prometedores resultados iniciales cayeron a la mitad en la cohorte de validación<sup>70</sup>. Huang et al. y Carpenter et al., a su vez, analizando los resultados metabolómicos en relación con exposiciones ambientales confirmaron que la enfermedad se asocia fuertemente a alteraciones en el metabolismo de aminoácidos y nucleósidos<sup>71,72</sup>.

*Orina.* En uno de los estudios realizados en orina de fumadores, parte de ellos pacientes con EPOC, McClay et al observaron (NMR) que sobre todo la trigonelina (alcaloide vegetal), pero también el hipurato y el formato se asociaban al FEV<sub>1</sub><sup>25</sup>. Estos tres metabolitos se relacionan con la dieta, pero los dos últimos también pueden proceder de la microbiota intestinal<sup>73</sup>. Wang et al. por su parte, reportaron niveles urinarios elevados de cuerpos cetónicos y de piruvato, así como del dipéptido carnosina (antioxidante) y algunos aminoácidos, con disminución de la metilnicotinamida y la creatinina<sup>26</sup>.

### *Modelos animales*

Los múltiples modelos experimentales relacionados con la EPOC han contribuido también a la identificación de metabolitos posiblemente implicados en esta patología<sup>74</sup>. Es el caso de algunos ácidos grasos o de la prostaglandina PGE<sub>2</sub><sup>75</sup>, que posteriormente se han confirmado en pacientes con la enfermedad. Además, en modelos animales de exacerbación se han identificado hasta 70 metabolitos característicos<sup>76</sup>. Los modelos animales también han permitido conocer que algunos metabolitos derivados del hábito tabáquico persisten en sangre hasta dos meses después de suspender la exposición<sup>77</sup>. Sin embargo, una pormenorización de los hallazgos en los modelos relacionados con la EPOC excede a los propósitos de la presente revisión.

## Gravedad de la afectación funcional

Ya se han citado anteriormente algunas asociaciones entre la afectación funcional y el perfil metabólico de los pacientes<sup>13,15,16,25,28</sup>. Cabe añadir que diferentes estudios realizados en muestras sanguíneas han reportado que diversos azúcares, aminoácidos y derivados (p. ej.  $\gamma$ -glutamilaminoácidos y aminoacil-ARNt), diglicéridos y fosfolípidos, nucleósidos y la trigonelina (derivado de la Vit B3) se asocian de forma directa o inversa a distintas variables de función pulmonar<sup>25,60,67,69</sup>. En general se ha visto que dicha función correlaciona bien con las vías relacionadas con dichas sustancias, y con las del metabolismo del nitrógeno, transportadores transmembrana dependientes de ATP (ABC) y las de absorción de determinados minerales<sup>14,15,67</sup>. Más recientemente, y utilizando métodos avanzados de *machine learning* (en concreto, una aproximación de *kernel machine regression*), se han conseguido reforzar este tipo de asociaciones, fundamentalmente con las de los mencionados transportadores ABC, metabolismo de ciertos aminoácidos, y las de la interacción ligando-receptor neuroactivo<sup>72</sup>.

## Fenotipos y EPOC

### *Fenotipos clásicos: Enfisema y Bronquitis*

Un fenotipo clásico es el del *paciente con enfisema*. Diversos autores observaron la asociación directa de esta alteración estructural con diversos metabolitos sanguíneos (tabla 3), incluyendo el citrato, diversos aminoácidos y moléculas ligadas a ellos (como la betaina, protectora del estrés celular osmótico), diglicéridos, glicerofosfolípidos y diversas esfingomielinas, cuerpos cetónicos, y algún ribonucleósido<sup>13,28,55,60,62,78,79</sup>. Por el contrario, otros aminoácidos y esfingomielinas, así como ceramidas, algún péptido (p.ej. sarcosina) o derivado de bases nitrogenadas (ácido  $\beta$ -aminoisobutírico), así como metabolitos ligados a la acetilación de proteínas han mostrado una asociación inversa con el enfisema<sup>62,66,78</sup>. Cabe

señalar también que algunos metabolitos muestran resultados contradictorios, dependiendo de los estudios. En un trabajo, realizado en esta ocasión con muestras de BAL, Halper-Stromberg encontraron un elevado número de metabolitos asociados con el enfisema, incluyendo los ligados a aminoácidos, ácidos grasos y fosfolípidos diversos<sup>28</sup>.

En cuanto a otras vías estrechamente asociadas con el enfisema se han reportado el ciclo de Krebs y la fosforilación oxidativa<sup>14,15</sup>, quizás con sobreproducción de radicales libres. En las redes obtenidas por Gillenwater et al. a partir de la cohorte COPDGene se hallaron implicados tres módulos, formados respectivamente por aminoácidos-fosfolípidos-ácidos biliares-acilcolinas, aminoácidos-Ciclo de Krebs-xenobióticos, y diversos esteroides<sup>56</sup>. Lamentablemente, el intento de validación posterior realizado en la cohorte SPIROMICS no confirmó del todo estos datos. Carpenter et al., en su análisis de *machine learning*, obtuvieron fuertes asociaciones entre el grado de enfisema y las redes de los transportadores ABC, el metabolismo de diversos aminoácidos y la interacción del ligando-receptor neuroactivo<sup>72</sup>. Más recientemente Godbole et al. han descrito un modelo predictivo del enfisema y su intensidad utilizando los resultados de los estudios SPIROMICS y COPDGene y 129 de los metabolitos, alcanzando a explicar inicialmente hasta un 60% de la variabilidad, pero de nuevo con sólo un 17% en la cohorte de validación<sup>70</sup>.

La pérdida de peso y masa muscular es frecuente en la EPOC, sobre todo en su fenotipo con enfisema y en casos avanzados. Analizando por separado este aspecto, Ubhi et al. reportaron que el estado nutricional se asociaba de forma directa al ácido ascórbico (Vit C), a un éster del ácido nicotínico (Vit. B3, a su vez precursor del dinucleótido adenina-nicotinamida o NAD), y a las lipoproteínas HDL, así como negativamente a la glutamina. A su vez, el grado extremo de esta alteración nutricional o caquexia se asociaba a disminuciones en aminoácidos ramificados, ascorbato, piruvato y glucosa, con incrementos en otros aminoácidos y en cuerpos cetónicos<sup>62</sup>.

Respecto del otro fenotipo clásico, el de la bronquitis crónica, también existe algún estudio que ha investigado sus asociaciones. Es el caso del trabajo de Esther et al. que encontraron elevaciones de ácido siálico en el esputo de estos enfermos<sup>33</sup>. Sin embargo, otros autores no han obtenido resultados tan claros al estudiar este metabolito en plasma<sup>14</sup>, probablemente por ser éste un fenotipo con afectación más local en el aparato respiratorio. Respecto a diferencias entre los fenotipos clasificados como enfisema más puro frente al de bronquitis crónica, Callejón-Leblkic et al. mostraron que los primeros muestran niveles séricos superiores a los segundos en glucosa e inferiores en ácido miristoleico ( $\omega$ -5), mientras que algunos aminoácidos y sus metabolitos eran superiores y otros inferiores en los pacientes con enfisema<sup>58</sup>. En un interesante trabajo Tan et al. estudiaron las diferencias entre pacientes con enfisema que además asocian en el TC alteraciones estructurales en la pared de los bronquios (sería un fenotipo ‘mixto’ de enfisema-bronquitis) frente a los que no (enfisema más puro), observando que los primeros poseen niveles menores de los aminoácidos glutamina y alanina que los segundos<sup>80</sup>.

#### *Disfunción muscular*

La disfunción muscular, asociada o no a pérdida de peso y/o de masa muscular es otra de las manifestaciones frecuentes en muchos pacientes con EPOC<sup>81</sup>. Existe un estudio en el que se investigó (NMR) el perfil metabólico plasmático en enfermos con dicha disfunción, hallando que muestran reducciones en la alanina, isoleucina y valina<sup>82</sup>.

#### *Exacerbadores frecuentes*

También los exacerbadores frecuentes presentan elementos metabólicos diferenciales, al igual que los sujetos con episodios agudos especialmente graves. Así, en el esputo de los enfermos con frecuentes agudizaciones de la cohorte SPIROMICS se encontraron niveles aumentados de ácido siálico, aminoácidos y derivados (incluyendo glutation) y bases



nitrogenadas<sup>33</sup>. Es más, algunos de estos biomarcadores permitían prever las próximas exacerbaciones<sup>33</sup>. Por su parte, Bowler et al. hallaron que la alteración habitual que se observa en el metabolismo de los fosfolípidos al analizar el esputo de los pacientes con EPOC, es a costa sobre todo de los gliceroesfingolípidos en los exacerbadores frecuentes<sup>55</sup>.

En cuanto al compartimento sanguíneo, los sujetos con alguna exacerbación en el año previo han mostrado (NMR, cohorte SPIROMICS) un gran número de metabolitos reducidos respecto del resto de enfermos. Fundamentalmente, se trataba de aminoácidos ramificados y triptófano<sup>83</sup>. En el estudio publicado por Cruickshank et al. (cohorte COPDGene), los sujetos con exacerbaciones frecuentes o graves asociaron cambios en diversos aminoácidos y derivados (incluyendo el aminoácido-ARNt), azúcares y carnitinas. Las vías más alteradas en estos exacerbadores frecuentes fueron de nuevo las que implican a dichas sustancias y las relacionadas con el metabolismo de purinas, transportadores ABC y absorción de determinados minerales<sup>15</sup>. En esta misma cohorte de pacientes, Gillenwater et al. obtuvieron que el derivado aminoácido trimetil-alaninilprolina y la ya citada betaína se hallaban fuertemente asociados al número de exacerbaciones<sup>14</sup>.

#### *Pronóstico desfavorable a corto plazo*

Una evolución desfavorable y relativamente rápida puede también considerarse un perfil específico de pacientes. A este respecto, los enfermos con EPOC y supervivencia reducida han mostrado (LC/MS, LC/MS/MS y GC/MS) una reducción más marcada que los de mejor recorrido vital en aminoácidos de cadena ramificada; con niveles elevados de fructosa, así como de moléculas ligadas al ciclo del ácido cítrico, tanto estándar (p.ej. succinato, fumarato, malato y lactato) como de sus variantes (metabolismo del glicoxilato y dicarboxilato), con alteraciones bien definidas en las vías de las pentosas-fosfato y de los glicerofosfolípidos. Todo esto último sugiriendo problemas especialmente importantes en la producción de energía<sup>84</sup>, tal como también sugieren las redes creadas por Gillenwater y Naz<sup>56,69</sup>. Además,

los pacientes con baja supervivencia han mostrado niveles elevados de un metabolito del vasodilatador bradicinina<sup>84</sup>, así como de polipéptidos asociados a la escisión del factor XII de la coagulación y del fibrinógeno, dos elementos que se han asociado a la formación espontánea de trombos<sup>85</sup>. Como ya se ha mencionado, un número importante de metabolitos se asocia a la función pulmonar, lo que podría permitir un seguimiento biológico que ayudaría a la definición de distintos perfiles evolutivos.

Otro tema interesante es el de los perfiles metabólicos en los *estadios más precoces de la enfermedad* frente a otras fases más avanzadas, lo que puede o no coincidir siempre con las edades de los pacientes. En este último sentido, la edad puede ser en sí un factor que profile diferentes expresiones de la enfermedad. En el ya citado estudio de Xue et al. se observó que las alteraciones en el ciclo de Krebs inferidas de sus resultados eran mucho más evidentes en enfermos mayores que en jóvenes con EPOC<sup>68</sup>.

#### *El EPOC 'eosinofílico' y el síndrome de interposición EPOC-Asma (ACO)*

Uno de los fenotipos o rasgos tratables más claramente definidos en la EPOC es el denominado 'eosinofílico', comúnmente caracterizado por cifras superiores a 300 de estas células por  $\mu\text{L}$ , y representando aproximadamente un 15-30% de los pacientes<sup>86,87</sup>. A menudo los diversos estudios metabolómicos realizados superponen este fenotipo al del síndrome de interposición o ACO, por lo que ambos se incluyen en este apartado.

Algunos autores han estudiado específicamente las alteraciones en el metaboloma que se asocian al síndrome ACO, hallando interesantes relaciones entre la función pulmonar de estos enfermos y tanto los niveles sanguíneos de glúcidos (glucosa y manosa), aminoácidos (p.ej. glutamina, serina o valina), lípidos (colesterol) y componentes del ciclo del ácido cítrico (citrato y succinato)<sup>88,89</sup>, como los urinarios de histidina<sup>90</sup>, o los obtenidos del condensado de aire exhalado en algunos aminoácidos (valina), ácidos grasos, cuerpos

cetónicos, alcoholes y ácido láctico<sup>91</sup>. Además, algunos metabolitos séricos, incluyendo los del párrafo anterior, así como diversos azúcares, ácido succínico y etanolamina<sup>89</sup> diferenciaban claramente a los enfermos con ACO de los otros fenotipos de EPOC o de asma bronquial<sup>89</sup>. Los primeros también parecen tener mayor disregulación de diversas citoquinas<sup>89</sup> e eicosanoides<sup>92</sup>. En sintonía con ello, en general se acepta que los pacientes con ACO se caracterizan por un estado metabólico más activado y con mayor consumo energético<sup>93,94</sup> que los pacientes con sólo una de las dos entidades, lo que podría explicar parcialmente una peor evolución<sup>39,95</sup>.

Un tema también interesante relacionado con el anterior es el de las diferencias entre las formas más puras de EPOC y las de asma bronquial. Así, Liang et al. observaron (LC-MS) que los primeros muestran niveles superiores en plasma de algunos aminoácidos (los tres ramificados y la fenilalanina), ácidos grasos y derivados (araquidónico, piroglutámico e indoxilsulfato), algunas xantinas y componentes del ciclo de Krebs (succinato), con niveles inferiores de otros lípidos (p.ej. el ácido palmítico, componente de las membranas celulares y del surfactante pulmonar) y xantinas, nucleósidos (como la inosina) y la bilirrubina<sup>96</sup>. Por otra parte, en el trabajo de De Laurentis et al. en aire exhalado se observó que los pacientes con EPOC muestran niveles superiores de algunos alcoholes (etanol y metanol) que los asmáticos, con niveles inferiores de acetona<sup>97</sup>. Resultados muy similares a los reportados más recientemente por Maniscalco et al.<sup>98</sup>. Las muestras de orina también podrían ser de utilidad para este mismo propósito, como sugiere el trabajo de Adamko et al., que observaron (NMR) que los enfermos con asma mostraban mayor contenido de glutamina, nuevamente succinato, la base nitrogenada uracilo (síntesis de enzimas y metabolismo de carbohidratos) y pantotenato [formación del coenzima A (CoA), implicado en la respiración celular y síntesis de principios inmediatos], con niveles más bajos de arginina, dimetilamina (síntesis

del NO), hidroxiiisovalerato (metabolismo del CoA), betaína, colina y metilnicotinamida (síntesis de hormonas esteroideas) que los que padecían EPOC<sup>99</sup>.

### **El proceso inverso: *Clustering* por endotipos**

De forma especular a la búsqueda de biomarcadores metabólicos para los distintos fenotipos descritos en la enfermedad, se han intentado generar directamente endotipos que a su vez los reclasifiquen. A este respecto es interesante el reciente trabajo de Gillenwater et al. que generó dos nuevos endotipos a partir de diversos metabolitos relacionados con las esfingomielinas<sup>100</sup>.

### **Influencia del sexo**

Ya se ha mencionado anteriormente que tanto en estudios muy amplios (cohortes de SPIROMICS y de COPDGene) como en otros más modestos, se ha hallado que los niveles séricos de carnitinas son inferiores en las enfermas tanto respecto de los hombres con EPOC como de las mujeres sanas<sup>56,69</sup>. Estos hallazgos en suero concuerdan con los de Balgoma et al. en BAL, donde un panel de mediadores lipídicos [en concreto, diversos ácidos grasos o el tromboxano B2 (TX2)] parecen capaces de diferenciar entre mujeres fumadoras con EPOC o sin ella, aunque esto no sucede con los varones<sup>31</sup>. Además, las vías del óxido nítrico y de la arginina se han hallado más alteradas en el suero de las mujeres con EPOC que en los varones, lo que podría estar relacionado con la presencia de niveles más elevados de estrés nitrosativo en las primeras<sup>69</sup>. Por el contrario, las vías predominantemente alteradas en los varones son las relacionadas con diversos lípidos (ácidos grasos, ceramidas y esfingolípidos)<sup>56</sup>. En las redes obtenidas por Gillenwater et al. a partir de los metabolitos mencionados en apartados anteriores, los módulos formados por aminoácidos-lisofosfolípidos-ácidos biliares-acilcolinas y aminoácidos-Ciclo de Krebs-xenobióticos parecen también más relevantes en varones con EPOC, mientras que una red de esteroides

lo sería en las enfermas<sup>56</sup>. Estas y otras diferencias tanto en marcadores metabólicos como en la presentación clínica de las enfermedades respiratorias se han relacionado tanto con temas hormonales como de exposición a noxas ligadas al entorno cultural<sup>101,102</sup>.

### **Exacerbaciones de la EPOC**

Existen sólo algunos trabajos que hayan tratado los cambios metabólicos en el momento concreto de las exacerbaciones, así como su predictibilidad. Ya se ha mencionado anteriormente el publicado por Esther et al., que permitió establecer predicciones sobre los próximos episodios agudos<sup>33</sup>. Respecto de las propias agudizaciones, Zhou et al. observaron que durante éstas se evidenciaban unos niveles algo inferiores del aminoácido taurina y del dipéptido glutamil-fenilalanina (indicativos de probable actividad catabólica de proteínas) que en los períodos de estabilidad, aunque sin alcanzar valores predictivos claros<sup>57</sup>. A su vez, Gulcev et al. han observado (NMR) reducciones en el nivel de triptófano durante los primeros días de la exacerbación, lo que probablemente deriva del aumento paralelo de una dioxigenasa<sup>103</sup>. Finalmente, cabe recordar que Van der Does et al. reportaron incrementos de los ácidos araquidónico y DPA, y de los mediadores de la ciclooxigenasa-2 en el esputo de pacientes con exacerbación<sup>34</sup>. Respecto de la gravedad de ésta, las vías que parecen más afectadas en casos graves parecen ser las catabólicas, tanto de azúcares como de aminoácidos (destacando arginina y prolina), ácidos grasos y esfingolípidos, así como nucleósidos, con muy probable impacto en la generación, uso y almacenamiento de energía<sup>15,39</sup>. Fortis et al. por su parte mostraron que los pacientes que requieren ingreso y uso de ventilación mecánica no invasiva muestran valores reducidos de glicina y de formato<sup>104</sup>. Por su parte, los pacientes con EPOC y neumonía revelan niveles disminuidos de citrato y de algunos aminoácidos y derivados (histidina, glutamina, prolina y creatinfosfato)<sup>104</sup>. Sin embargo, y a pesar de todos estos estudios no existe un marcador metabólico preciso ni de exacerbación ni de exacerbación grave.

## La microbiota y la EPOC

El principal componente de la microbiota humana es la flora intestinal, compuesta por una amplia variedad de microorganismos. Existen evidencias progresivas de que la microbiota juega un papel fundamental en el desarrollo y maduración del sistema inmunitario, con potenciales efectos en órganos como el pulmón<sup>105</sup>. Por esta razón y por las interacciones probables entre las microbiotas intestinal y pulmonar se habla del ‘eje intestino pulmón’<sup>106</sup>. Un tema relevante a tener presente es que la microbiota de un individuo está sujeta a variaciones a lo largo de su vida, en función de cambios internos y del ambiente (infecciones, fármacos, dieta)<sup>107-110</sup>.

En estudios con muestras fecales se ha reportado que existen diversos metabolitos que se expresan diferencialmente entre pacientes con EPOC y controles sanos. Es el caso de catabolitos diversos procedentes de los tres principios inmediatos<sup>27</sup>. Los efectos metabólicos de la flora que compone el microbioma también pueden estudiarse de forma indirecta, en otras muestras biológicas. Así, McClay et al. hallaron algunos metabolitos sugestivos de procedencia intestinal (p. ej. hipurato y formato) expresados diferencialmente en la orina de pacientes con EPOC respecto de los controles<sup>25</sup>. La microbiota parece también capaz de influir en la clínica heterogénea característica de la EPOC. Algunos autores, como Kotlyarov et al. han sugerido que las oscilaciones en los niveles de ácidos grasos de cadena corta, derivados del metabolismo de los microorganismos intestinales, influirían en la expresión diferencial de la enfermedad<sup>111</sup>. De modo recíproco, otros autores han reportado diferencias en la microbiota intestinal de pacientes con enfermedad leve-moderada frente a los que presentan estadios más graves. En estos últimos serían más abundantes las fusobacterias y los aerococos, con especificidades también para el fenotipo eosinofílico, que mostraría abundantes bacteroides en su intestino<sup>112</sup>. Unas diferencias que también se observan en el microbioma respiratorio, donde los pacientes más graves presentan incremento de

pseudomonas<sup>113</sup>, mientras que los de tipo eosinofílico muestran más diversidad de géneros, con mayor abundancia del estreptococo termófilo y menor del bacilo gramnegativo *Ochrobactrum* que los no eosinofílicos<sup>113,114</sup>. La composición de la microbiota respiratoria también se ha asociado a la afectación funcional, la hiperreactividad bronquial y la expresión clínica, especialmente en referencia a los géneros estreptococo, estafilococo y pseudomona<sup>115</sup>, que además se asocian a cambios en los niveles de diversos fosfolípidos, poliaminas y xantinas en el BAL<sup>116</sup>. Por otra parte, el empobrecimiento del microbioma respiratorio, con dominancia del *Haemophilus*, se ha visto asociado a un riesgo aumentado de muerte en la EPOC<sup>117</sup>. Respecto de la relación entre las exacerbaciones y el microbioma respiratorio es obvio que las cargas viral y bacteriana aumentan su probabilidad, lo que se ha atribuido no sólo a la obvia capacidad infectiva sino a su potencial para lesionar el epitelio bronquial, estimulando la secreción de mucinas, con liberación de citoquinas proinflamatorias y especies reactivas de oxígeno<sup>118,119</sup>. Además, los exacerbadores frecuentes muestran una diversidad bacteriana reducida<sup>120</sup>, con aumento de las pseudomonas<sup>113</sup>.

### **Aspectos a dilucidar**

Tal como resaltan diferentes revisiones recientes del tema, las mayores carencias actuales sobre la metabolómica característica de la EPOC hacen referencia a factores como la edad y el sexo, fases temporales de la enfermedad, gravedad, trayectorias de progresión y episodios agudos<sup>23,39,121</sup>. Otro importante problema es la frecuente y marcada juventud de los controles, así como la extracción de múltiples trabajos a partir de pocas cohortes, amplias pero también muy concretas en los perfiles de enfermos y controles. Además, los estudios de validación de los modelos inicialmente generados han sido hasta ahora poco alentadores, por lo que la aplicabilidad clínica de la metabolómica en la EPOC requerirá todavía de nuevos avances y

concreciones. Sin embargo, su potencial es enorme tanto para el diagnóstico como para una mejor tipificación de los endotipos y fenotipos de la enfermedad.

En resumen, existen múltiples trabajos realizados para estudiar el metaboloma de los pacientes con EPOC, utilizando técnicas y muestras diversas, tanto respiratorias como sistémicas. Aunque existen todavía puntos oscuros, destacan los hallazgos en el metabolismo de aminoácidos, lípidos (sobre todo fosfolípidos y eicosanoides) y ácidos nucleicos. Estos resultados revelan diferentes aspectos de la fisiopatología y heterogeneidad de la enfermedad, como la inflamación, el estrés oxidativo, catabolismo proteico, déficits en la producción de energía y potenciales alteraciones en la coagulación.

## Referencias.

1. Miravittles M, Calle M, Molina J, Almagro P, Gómez JT, Trigueros JA et al. Spanish COPD guidelines (GesEPOC) 2021: Updated pharmacological treatment of stable COPD. *Arch Bronconeumol* 2022; 58:69-81.
2. Global Initiative for Chronic Obstructive Pulmonary Disease. 2022 GOLD report. Accesible en: <https://goldcopd.org/2022-gold-reports-2/>. Acceso en octubre 2022.
3. Celli BR, Singh D, Vogelmeier C, Agusti A. New perspectives on chronic obstructive pulmonary disease. *Int J Chron Obstruct Pulmon Dis* 2022; 17:2127-36.
4. Gea J. COPD therapy: Beyond conventional pharmacology. *Arch Bronconeumol (Engl Ed)* 2020; 56:343-4.
5. Gea J, Pascual S, Castro-Acosta A, Hernández-Carcereny C, Castelo R, Márquez-Martín E et al. The BIOMEPOC Project: Personalized biomarkers and clinical profiles in chronic obstructive pulmonary disease. *Arch Bronconeumol (Engl Ed)* 2019; 55:93-9.



6. Wang C, Jiang S, Zhang S, Ouyang Z, Wang G, Wang F. Research progress of metabolomics in asthma. *Metabolites* 2021; 11:567.
7. Schauer N, Steinhauser D, Strelkov S, Schomburg D, Allison G, Moritz T et al. GC-MS libraries for the rapid identification of metabolites in complex biological samples. *FEBS Lett* 2005; 579:1332-7.
8. Gika HG, Theodoridis GA, Wingate JE, Wilson ID. Within-day reproducibility of an LC-MS-based method for metabolomic analysis: application to human urine. *J. Proteome Res* 2007; 6: 3291-303.
9. Soga T, Ohashi Y, Ueno Y. Quantitative metabolome analysis using capillary electrophoresis mass spectrometry. *J Proteome Res* 2003; 2: 488-94.
10. Beckonert O, Keun HC, Ebbels TM, Bundy J, Holmes E, Lindon JC et al. Metabolic profiling, metabolomic and metabonomic procedures for NMR spectroscopy of urine, plasma, serum and tissue extracts». *Nat Protoc* 2007; 2: 2692-703.
11. Gruzieva O, Jeong A, He S, Yu Z, de Bont J, Pinho MGM et al. Air pollution, metabolites and respiratory health across the life-course. *Eur Respir Rev* 2022; 31:220038.
12. Lange P, Celli B, Agustí A, Jensen GB, Divo M, Faner R et al. Lung-function trajectories leading to chronic obstructive pulmonary disease. *N Engl J Med* 2015; 373: 111–22.
13. Mastej E, Gillenwater L, Zhuang Y, Pratte KA, Bowler RP, Kechris K. Identifying protein-metabolite networks associated with COPD phenotypes. *Metabolites* 2020; 10: 124.
14. Gillenwater LA, Pratte KA, Hobbs BD, Cho MH, Zhuang Y, Halperg-Stromberg E et al. Plasma metabolomic signatures of chronic obstructive pulmonary disease and the impact of genetic variants on phenotype-driven modules. *Netw Syst Med* 2020; 3: 159-81.

15. Cruickshank-Quinn CI, Jacobson S, Hughes G, Powell RL, Petrache I, Kechris K et al. Metabolomics and transcriptomics pathway approach reveals outcome-specific perturbations in COPD. *Sci Rep* 2018; 8: 17132.
16. Chen Q, Deeb RS, Ma Y, Staudt MR, Crystal RG, Gross SS. Serum metabolite biomarkers discriminate healthy smokers from COPD smokers. *PLoS ONE* 2015; 10:e0143937.
17. Nassan FL, Wang C, Kelly RS, Lasky-Su JA, Vokonas PS, Koutrakis P et al. Ambient PM<sub>2.5</sub> species and ultrafine particle exposure and their differential metabolomic signatures. *Environ Int* 2021; 151:106447.
18. Jin L, Godri Pollitt KJ, Liew Z, Rosen Vollmar AK, Vasiliou V, Johnson CH et al. Use of untargeted metabolomics to explore the air pollution-related disease continuum. *Curr Environ Health Rep* 2021; 8: 7–22.
19. Nassan FL, Kelly RS, Koutrakis P, Vokonas PS, Lasky-Su J, Schwartz JD. Metabolomic signatures of the short-term exposure to air pollution and temperature. *Environ Res* 2021; 201: 111553.
20. Gaskins AJ, Tang Z, Hood RB, Ford J, Schwartz JD, Jones DP et al. Periconception air pollution, metabolomic biomarkers, and fertility among women undergoing assisted reproduction. *Environ Int* 2021; 155: 106666.
21. Du X, Zhang Q, Jiang Y, Li H, Zhu X, Zhang Y et al. Dynamic molecular choreography induced by traffic exposure: a randomized, crossover trial using multi-omics profiling. *J Hazard Mater* 2021; 424:127359.
22. Zhang Y, Chu M, Zhang J, Duan J, Hu D, Zhang W et al. Urine metabolites associated with cardiovascular effects from exposure of size-fractioned particulate matter in a subway environment: a randomized crossover study. *Environ Int* 2019; 130: 104920.

23. Godbole S, Bowler RP. Metabolome features of COPD: A Scoping Review. *Metabolites* 2022 5; 12:621.
24. Kim DJ, Oh JY, Rhee CK, Park SJ, Shim JJ, Cho JY. Metabolic fingerprinting uncovers the distinction between the phenotypes of tuberculosis associated COPD and smoking-induced COPD. *Front Med* 2021; 8: 619077.
25. McClay JL, Adkins DE, Isern NG, O'Connell TM, Wooten JB, Zedler BK et al. (1)H nuclear magnetic resonance metabolomics analysis identifies novel urinary biomarkers for lung function. *J Proteome Res* 2010; 9: 3083-90.
26. Wang L, Tang Y, Liu S, Mao S, Ling Y, Liu D et al. Metabonomic profiling of serum and urine by 1H NMR-based spectroscopy discriminates patients with chronic obstructive pulmonary disease and healthy individuals. *PLoS ONE* 2013; 8:e65675.
27. Bowerman KL, Rehman SF, Vaughan A, Lachner N, Budden KF, Kim RY et al. Disease-associated gut microbiome and metabolome changes in patients with chronic obstructive pulmonary disease. *Nat. Commun.* 2020; 11:5886.
28. Halper-Stromberg E, Gillenwater L, Cruickshank-Quinn C, O'Neal WK, Reisdorph N, Petrache I et al. Bronchoalveolar lavage fluid from COPD patients reveals more compounds associated with disease than matched plasma. *Metabolites* 2019; 9: 157.
29. Berdyshev EV, Serban KA, Schweitzer KS, Bronova IA, Mikosz A, Petrache I. Ceramide and sphingosine-1 phosphate in COPD lungs. *Thorax* 2021; 76:821-5.
30. Wendt CH, Nelsestuen G, Harvey S, Gulcev M, Stone M, Reilly C. Peptides in bronchoalveolar lavage in chronic obstructive pulmonary disease. *PloS one* 2016; 11: e0155724.
31. Balgoma D, Yang M, Sjödin M, Snowden S, Karimi R, Levänen B et al. Linoleic acid-derived lipid mediators increase in a female-dominated subphenotype of COPD. *Eur Respir J* 2016; 47:1645-56.

32. Zhu T, Li S, Wang J, Liu C, Gao L, Zeng Y et al. Induced sputum metabolomic profiles and oxidative stress are associated with chronic obstructive pulmonary disease (COPD) severity: potential use for predictive, preventive, and personalized medicine. *EPMA J* 2020; 11:645-59.
33. Esther CR, O'Neal WK, Anderson WH, Kesimer M, Ceppe A, Doerschuk CM et al. Identification of sputum biomarkers predictive of pulmonary exacerbations in COPD. *Chest* 2022; 161:1239-49.
34. van der Does AM, Heijink M, Mayboroda OA, Persson LJ, Aanerud M, Bakke P et al. Dynamic differences in dietary polyunsaturated fatty acid metabolism in sputum of COPD patients and controls. *Biochim Biophys Acta Mol Cell Biol Lipids* 2019; 1864:224-33.
35. Azimzadeh S, Mirzaie M, Jafari M, Mehrani H, Shariati P, Khodabandeh M. Signaling network of lipids as a comprehensive scaffold for omics data integration in sputum of COPD patients. *Biochim Biophys Acta* 2015; 1851:1383-93.
36. Yan Z, Chen B, Yang Y, Yi X, Wei M, Ecklu-Mensah G et al. Multi-omics analyses of airway host-microbe interactions in chronic obstructive pulmonary disease identify potential therapeutic interventions. *Nat Microbiol* 2022; 7:1361-75.
37. Celejewska-Wójcik N, Kania A, Górka K, Nastalek P, Wójcik K, Gielicz A et al. Eicosanoids and eosinophilic inflammation of airways in stable COPD. *Int J Chronic Obs Pulm Dis* 2021; 16:1415-24.
38. Peel AM, Wilkinson M, Sinha A, Loke YK, Fowler SJ, Wilson AM. Volatile organic compounds associated with diagnosis and disease characteristics in asthma - A systematic review. *Respir Med* 2020; 169:105984.

39. Paris D, Palomba L, Tramice A, Motta L, Fuschillo S, Maniscalco M et al. Identification of biomarkers in COPD by metabolomics of exhaled breath condensate and serum/plasma. *Minerva Med* 2022; 113:424-43.
40. Horváth I, Barnes PJ, Loukides S, Sterk PJ, Högman M, Olin AC et al. A European Respiratory Society technical standard: exhaled biomarkers in lung disease. *Eur Respir J* 2017; 49:1600965.
41. De Laurentiis G, Paris D, Melck D, Maniscalco M, Marsico S, Corso G et al. Metabonomic analysis of exhaled breath condensate in adults by nuclear magnetic resonance spectroscopy. *Eur Respir J* 2008; 32:1175-83.
42. Motta A, Paris D, Melck D, de Laurentiis G, Maniscalco M, Sofia M, et al. Nuclear magnetic resonance-based metabolomics of exhaled breath condensate: methodological aspects. *Eur Respir J* 2012; 39:498-500.
43. Bertini I, Luchinat C, Miniati M, Monti S, Tenori L. Phenotyping COPD by H-1 NMR metabolomics of exhaled breath condensate. *Metabolomics* 2014; 10:302–11.
44. Bregy L, Nussbaumer-Ochsner Y, Sinues P, García-Gómez D, Suter Y, Gaisl T et al. Real-time mass spectrometric identification of metabolites characteristic of chronic obstructive pulmonary disease in exhaled breath. *Clin. Mass Spectrom* 2018; 7:29-35.
45. Cazzola M, Segreti A, Capuano R, Bergamini A, Martinelli E, Calzetta L et al. Analysis of exhaled breath fingerprints and volatile organic compounds in COPD. *COPD Res Pract* 2015; 1:277.
46. Westhoff M, Litterst P, Maddula S, Bödeker B, Rahmann S, Davies AN et al. Differentiation of chronic obstructive pulmonary disease (COPD) including lung cancer from healthy control group by breath analysis using ion mobility spectrometry. *Int J Ion Mobil Spectrom* 2010; 13:131-9.

47. Gaida A, Holz O, Nell C, Schuchardt S, Lavae-Mokhtari B, Kruse L et al. A dual center study to compare breath volatile organic compounds from smokers and non-smokers with and without COPD. *J Breath Res* 2016; 10:026006.
48. Rodríguez-Aguilar M, Ramírez-García S, Ilizaliturri-Hernández C, Gómez-Gómez A, Van-Brussel E, Díaz-Barriga, F et al. Ultrafast gas chromatography coupled to electronic nose to identify volatile biomarkers in exhaled breath from chronic obstructive pulmonary disease patients: A pilot study. *Biomed Chromatogr* 2019; 33:e4684.
49. Regan EA, Hokanson JE, Murphy JR, Make B, Lynch DA, Beaty TH et al. Genetic epidemiology of COPD (COPDGene) study design. *COPD* 2010; 7:32–43.
50. Couper D, LaVange LM, Han M, Barr RG, Bleecker E, Hoffman EA et al. Design of the subpopulations and intermediate outcomes in COPD study (SPIROMICS). *Thorax* 2014; 69:492-5.
51. Vestbo J, Anderson W, Coxson HO, Crim C, Dawer F, Edwards L et al. Evaluation of COPD longitudinally to identify predictive surrogate end-points (ECLIPSE). *Eur Respir J* 2008; 31:869-73.
52. Kohler M, Sandberg A, Kjellqvist S, Thomas A, Karimi R, Nyren S et al. Gender differences in the bronchoalveolar lavage cell proteome of patients with chronic obstructive pulmonary disease. *J. Allergy Clin. Immunol.* 2013; 131 :743-51.
53. Titz B, Luettich K, Leroy P, Boue S, Vuillaume G, Vihervaara T et al. Alterations in serum polyunsaturated fatty acids and eicosanoids in patients with mild to moderate chronic obstructive pulmonary disease (COPD). *Int J Mol Sci* 2016; 17:1583.
54. Kilk K, Aug A, Ottas A, Soomets U, Altraja S, Altraja A. Phenotyping of chronic obstructive pulmonary disease based on the integration of metabolomes and clinical characteristics. *Int J Mol Sci* 2018; 19:666.

55. Bowler RP, Jacobson S, Cruickshank C, Hughes GJ, Siska C, Ory DS et al. Plasma sphingolipids associated with chronic obstructive pulmonary disease phenotypes. *Am J Respir Crit Care Med* 2015; 191:275-84.
56. Gillenwater LA, Kechris KJ, Pratte KA, Reisdorph N, Petrache I, Labaki WW et al. Metabolomic profiling reveals sex specific associations with chronic obstructive pulmonary disease and emphysema. *Metabolites* 2021; 11:161.
57. Zhou J, Li Q, Liu C, Pang R, Yin Y. Plasma metabolomics and lipidomics reveal perturbed metabolites in different disease stages of chronic obstructive pulmonary disease. *Int J Chronic Obstr Pulm Dis* 2020; 15:553-65.
58. Callejón-Leblic B, Pereira-Vega A, Vázquez-Gandullo E, Sánchez-Ramos J, Gómez-Ariza J, García-Barrera T. Study of the metabolomic relationship between lung cancer and chronic obstructive pulmonary disease based on direct infusion mass spectrometry. *Biochimie* 2019; 157:111-22.
59. Liu D, Meister M, Zhang S, Vong CI, Wang S, Fang R et al. Identification of lipid biomarker from serum in patients with chronic obstructive pulmonary disease. *Respir Res* 2020; 21:242.
60. Diao W, Labaki WW, Han MK, Yeomans L, Sun Y, Smiley Z et al. Disruption of histidine and energy homeostasis in chronic obstructive pulmonary disease. *Int J Chronic Obstr Pulm Dis* 2019; 14:2015-25.
61. Zheng H, Hu Y, Dong L, Shu Q, Zhu M, Li, Y et al. Predictive diagnosis of chronic obstructive pulmonary disease using serum metabolic biomarkers and least-squares support vector machine. *J Clin Lab Anal* 2021; 35:e23641.
62. Ubhi BK, Riley JH, Shaw PA, Lomas DA, Tal-Singer R, MacNee, W et al. Metabolic profiling detects biomarkers of protein degradation in COPD patients. *Eur Respir J* 2012; 40:345-55.

63. Ruzsics I, Nagy L, Keki S, Sarosi V, Illes B, Illes Z et al. L-Arginine pathway in COPD patients with acute exacerbation: A new potential biomarker. *COPD* 2016; 13:139-45.
64. Scott JA, Duongh M, Young AW, Subbarao P, Gauvreau GM, Grasmann H. Asymmetric dimethylarginine in chronic obstructive pulmonary disease (ADMA in COPD). *Int J Mol Sci* 2014; 15:6062-71.
65. Prokic I, Lahousse L, De Vries M, Liu, J, Kalaoja M, Vonk JM et al. A cross-omics integrative study of metabolic signatures of chronic obstructive pulmonary disease. *BMC Pulm. Med* 2020; 20:193.
66. Celli BR, Locantore N, Yates J, Tal-Singer R, Miller BE, Bakke P et al. Inflammatory biomarkers improve clinical prediction of mortality in chronic obstructive pulmonary disease. *Am J Respir Crit Care Med* 2012; 185:1065-72.
67. Yu B, Flexeder C, McGarrah RW, Wyss A, Morrison AC, North KE, Boerwinkle E et al. Metabolomics identifies novel blood biomarkers of pulmonary function and COPD in the general population. *Metabolites* 2019; 9:61.
68. Xue M, Zeng Y, Lin R, Qu HQ, Zhang T, Zhang XD et al. Metabolomic profiling of anaerobic and aerobic energy metabolic pathways in chronic obstructive pulmonary disease. *Exp Biol Med* 2021; 246: 1586-96.
69. Naz S, Kolmert J, Yang M, Reinke SN, Kamleh MA, Snowden S et al. Metabolomics analysis identifies sex-associated metabotypes of oxidative stress and the autotaxin-lysoPA axis in COPD. *Eur Respir J* 2017; 49:1602322.
70. Godbole S, Labaki WW, Pratte KA, Hill A, Moll M, Hastie AT et al. A metabolomic severity score for airflow obstruction and emphysema. *Metabolites* 2022; 12:368.



71. Huang Q, Hu D, Wang X, Chen Y, Wu Y, Pan L et al. The modification of indoor PM<sub>2.5</sub> exposure to chronic obstructive pulmonary disease in Chinese elderly people: A meet-in-metabolite analysis. *Environ Int* 2018; 121:1243-52.
72. Carpenter CM, Zhang W, Gillenwater L, Severn C, Ghosh T, Bowler R et al. PaIRKAT: A pathway integrated regression-based kernel association test with applications to metabolomics and COPD phenotypes. *PLoS Comput Biol* 2021;17:e1008986.
73. Pallister T, Jackson MA, Martin TC, Zierer J, Jennings A, Mohny RP et al. Hippurate as a metabolomic marker of gut microbiome diversity: modulation by diet and relationship to metabolic syndrome. *Sci Rep* 2017; 7: 13670.
74. Ghorani V, Boskabady MH, Khazdair MR, Kianmeher M. Experimental animal models for COPD: A methodological review. *Tob Induc Dis* 2017; 15:25.
75. Li J, Yang L, Li Y, Tian Y, Li S, Jiang S et al. Metabolomics study on model rats of chronic obstructive pulmonary disease treated with Bu-Fei Jian-Pi. *Mol Med Rep* 2015; 11:1324-33.
76. Kim HY, Lee HS, Kim IH, Kim Y, Ji M, Oh S et al. Comprehensive targeted metabolomic study in the lung, plasma, and urine of PPE/LPS-induced COPD mice model. *Int J Mol Sci* 2022; 23:2748
77. Cruickshank-Quinn CI, Mahaffey S, Justice MJ, Hughes G, Armstrong M, Bowler RP et al. Transient and persistent metabolomic changes in plasma following chronic cigarette smoke exposure in a mouse model. *PLoS One* 2014; 9:e101855.
78. Ubhi BK, Cheng KK, Dong J, Janowitz T, Jodrell D, Tal-Singer R et al. Targeted metabolomics identifies perturbations in amino acid metabolism that sub-classify patients with COPD. *Mol BioSyst* 2012; 8:3125-33.
79. Gu F, Derkach A, Freedman ND, Landi MT, Albanes D, Weinstein SJ et al. Cigarette smoking behaviour and blood metabolomics. *Int J Epidemiol* 2016; 45:1421-32.

80. Tan LC, Yang WJ, Fu WP, Su P, Shu JK, Dai LM. <sup>1</sup>HNMR-based metabolic profiling of healthy individuals and high-resolution CT-classified phenotypes of COPD with treatment of tiotropium bromide. *Int J Chron Obstruct Pulmon Dis* 2018; 13:2985-97.
81. Gea J, Sancho-Muñoz A, Chalela R. Nutritional status and muscle dysfunction in chronic respiratory diseases: stable phase versus acute exacerbations. *J Thorac Dis* 2018; 10(Suppl 12):S1332-S1354.
82. Rodriguez DA, Alcarraz-Vizan G, Diaz-Moralli S, Reed M, Gomez FP, Falciani F et al. Plasma metabolic profile in COPD patients: effects of exercise and endurance training. *Metabolomics* 2012; 8:508-16.
83. Llabaki WW, Gu T, Murray S, Curtis JL, Yeomans L, Bowler RP et al. Serum amino acid concentrations and clinical outcomes in smokers: SPIROMICS metabolomics study. *Sci Rep* 2019; 9:11367.
84. Pinto-Plata V, Casanova C, Divo M, Tesfaigzi Y, Calhoun V, Sui J et al. Plasma metabolomics and clinical predictors of survival differences in COPD patients. *Respir Res* 2019; 20:219.
85. Greenberg CS, Miraglia CC, Rickles FR, Shuman MA. Cleavage of blood coagulation factor XIII and fibrinogen by thrombin during in vitro clotting. *J Clin Invest* 1985; 75: 1463-70.
86. Miravittles M, Monteagudo M, Solntseva I, Alcázar B. Blood eosinophil counts and their variability and risk of exacerbations in COPD: a population-based study. *Arch Bronconeumol* 2021; 57:13-20.
87. Miravittles M, Soler-Cataluña JJ, Soriano JB, García-Río F, de Lucas P, Alfageme I et al. Determinants of blood eosinophil levels in the general population and patients with COPD: a population-based, epidemiological study. *Respir Res* 2022; 23:49.

88. Ghosh N, Choudhury P, Subramani E, Saha D, Sengupta S, Joshi M et al. Metabolomic signatures of asthma-COPD overlap (ACO) are different from asthma and COPD. *Metabolomics* 2019; 15:87.
89. Ghosh N, Choudhury P, Kaushik SR, Arya R, Nanda R, Bhattacharyya P et al. Metabolomic fingerprinting and systemic inflammatory profiling of asthma COPD overlap (ACO). *Respir Res* 2020; 21:126.
90. Oh JY, Lee YS, Min KH, Hur GY, Lee SY, Kang KH et al. Increased urinary L-histidine in patients with asthma COPD overlap: a pilot study. *Int J Chron Obstruct Pulmon Dis* 2018; 13: 1809-18.
91. Ghosh N, Choudhury P, Joshi M, Bhattacharyya P, Roychowdhuri S, Banerjee R et al. Global metabolome profiling of exhaled breath condensates in male smokers with asthma COPD overlap and prediction of the disease. *Sci Rep* 2021; 11:16664.
92. Cai C, Bian X, Xue M, Liu X, Hu H, Wang J et al. Eicosanoids metabolized through LOX distinguish asthma-COPD overlap from COPD by metabolomics study. *Int J Chron Obstruct Pulmon Dis* 2019; 14:1769-78.
93. Papaiwannou A, Zarogoulidis P, Porpodis K, Spyrtos D, Kioumis I, Pitsiou G et al. Asthma-chronic obstructive pulmonary disease overlap syndrome (ACOS): current literature review. *J Thorac Dis* 2014; 6 (Suppl 1):S146-51.
94. Sorino C, Scichilone N, D'Amato M, Patella V, DI Marco F. Asthma-COPD overlap syndrome: recent advances in diagnostic criteria and prognostic significance. *Minerva Med* 2017; 108 (Suppl 1):1-5.
95. Menezes AMB, Montes de Oca M, Pérez-Padilla R, Nadeau G, Wehrmeister FC, Lopez-Varela MV et al. Increased risk of exacerbation and hospitalization in subjects with an overlap phenotype: COPD-asthma. *Chest* 2014; 145:297-304.

96. Liang Y, Gai XY, Chang C, Zhang X, Wang J, Li TT. Metabolomic profiling differences among asthma, COPD, and healthy subjects: A LC-MS-based metabolomic analysis. *Biomed Environ Sci* 2019; 32:659-72.
97. De Laurentiis G, Paris D, Melck D, Montuschi P, Maniscalco M, Bianco A et al. Separating smoking-related diseases using NMR-based metabolomics of exhaled breath condensate. *J Proteome Res* 2013; 12:1502–11.
98. Maniscalco M, Paris D, Melck DJ, Molino A, Carone M, Ruggeri P et al. Differential diagnosis between newly diagnosed asthma and COPD using exhaled breath condensate metabolomics: A pilot study. *Eur Respir J* 2018; 51:1701825.
99. Adamko DJ, Nair P, Mayers I, Tsuyuki RT, Regush S, Rowe BH. Metabolomic profiling of asthma and chronic obstructive pulmonary disease: A pilot study differentiating diseases. *J Allergy Clin Immunol* 2015; 136:571-80.
100. Gillenwater LA, Helmi S, Stene E, Pratte KA, Zhuang Y, Schuyler RP et al. Multi-omics subtyping pipeline for chronic obstructive pulmonary disease. *PLoS ONE* 2021; 16:e0255337.
101. Almqvist C, Worm M, Leynaert B. Impact of gender on asthma in childhood and adolescence: A GA2LEN review. *Allergy* 2007; 63:47-57.
102. Ausín P, Martínez-Llorens J, Sabaté-Bresco M, Casadevall C, Barreiro E, Gea J. Sex differences in function and structure of the quadriceps muscle in chronic obstructive pulmonary disease patients. *Chron Respir Dis* 2017; 14:127-39.
103. Gulcev M, Reilly C, Griffin TJ, Broeckling CD, Sandri BJ, Witthuhn BA et al. Tryptofan catabolism in acute exacerbations of chronic obstructive pulmonary disease. *Int J Chron Obstruct Pulmon Dis* 2016; 11:2435-46.

104. Fortis S, Luszczek ER, Weinert CR, Beilman GJ. Metabolomics in COPD acute respiratory failure requiring noninvasive positive pressure ventilation. *Can Respir J* 2017; 2017:9480346.
105. Chunxi L, Haiyue L, Yanxia L, Jianbing P, Jin S. The gut microbiota and respiratory diseases: new evidence. *J Immunol Res* 2020:2340670.
106. He Y, Wen Q, Yao F, Xu D, Huang Y, Wang J. Gut-lung axis: the microbial contributions and clinical implications. *Crit Rev Microbiol* 2017; 43:81–95.
107. Kozik AJ, Holguin F, Segal LN, Chatila TA, Dixon AE, Gern JE et al. Microbiome, metabolism, and immunoregulation of asthma: An American Thoracic Society and National Institute of Allergy and Infectious Diseases workshop report. *Am J Respir Cell Mol Biol* 2022; 67:155-63.
108. Cuello-Garcia CA, Brożek JL, Fiocchi A, Pawankar R, Yepes-Nuñez JJ, Terracciano L et al. Probiotics for the prevention of allergy: a systematic review and meta-analysis of randomized controlled trials. *J Allergy Clin Immunol* 2015; 136:952–61.
109. Li L, Fang Z, Lee Y-K, Zhao J, Zhang H, Lu W et al. Prophylactic effects of oral administration of *Lactobacillus casei* on house dust mite-induced asthma in mice. *Food Funct* 2020; 11:9272-84.
110. Hill C, Guarner F, Reid G, Gibson GR, Merenstein DJ, Pot B et al. Expert consensus document: the International Scientific Association for probiotics and prebiotics consensus statement on the scope and appropriate use of the term probiotic. *Nat Rev Gastroenterol Hepatol* 2014; 11:506–14.
111. Kotlyarov S. Role of short-chain fatty acids produced by gut microbiota in innate lung immunity and pathogenesis of the heterogeneous course of chronic obstructive pulmonary disease. *Int J Mol Sci* 2022; 23:4768

112. Chiu YC, Lee SW, Liu CW, Lin RC, Huang YC, Lan TY et al. Comprehensive profiling of the gut microbiota in patients with chronic obstructive pulmonary disease of varying severity. *PLoS One* 2021; 16:e0249944.
113. Millares L, Pascual S, Montón C, García-Núñez M, Lalmolda C, Faner R et al. Relationship between the respiratory microbiome and the severity of airflow limitation, history of exacerbations and circulating eosinophils in COPD patients. *BMC Pulm Med* 2019; 19:112.
114. Yang R, Zhang Q, Ren Z, Li H, Ma Q. Different airway inflammatory phenotypes correlate with specific fungal and bacterial microbiota in asthma and chronic obstructive pulmonary disease. *J Immunol Res* 2022; 2022:2177884.
115. Opron K, Begley LA, Erb-Downward JR, Freeman C, Madapoosi S, Alexis NE et al. Lung microbiota associations with clinical features of COPD in the SPIROMICS cohort. *NPJ Biofilms Microbiomes* 2021; 7:14.
116. Madapoosi SS, Cruickshank-Quinn C, Opron K, Erb-Downward JR, Begley LA, Li G et al. Lung microbiota and metabolites collectively associate with clinical outcomes in milder stage chronic obstructive pulmonary disease. *Am J Respir Crit Care Med* 2022; 206:427-39.
117. Dicker AJ, Huang JTJ, Lonergan M, Keir HR, Fong CJ, Tan B et al. The sputum microbiome, airway inflammation, and mortality in chronic obstructive pulmonary disease. *J Allergy Clin Immunol* 2021; 147:158-67.
118. Heinrich A, Heyl KA, Klaile E, Müller MM, Klassert TE, Wiessner A et al. *Moraxella catarrhalis* induces CEACAM3-Syk-CARD9-dependent activation of human granulocytes. *Cell Microbiol* 2016; 18:1570–82.

119. Zahlten J, Kim Y-J, Doehn J-M, Pribyl T, Hocke AC, García P et al. *Streptococcus pneumoniae*-induced oxidative stress in lung epithelial cells depends on pneumococcal autolysis and is reversible by resveratrol. *J Infect Dis* 2015; 211:1822–30.
120. Yang CY, Li SW, Chin CY, Hsu CW, Lee CC, Yeh YM et al. Association of exacerbation phenotype with the sputum microbiome in chronic obstructive pulmonary disease patients during the clinically stable state. *J Transl Med* 2021; 19:121.
121. Fuschillo S, Paris D, Tramice A, Ambrosino P, Palomba L, Maniscalco M et al. Metabolomic profiling of exhaled breath condensate and plasma/serum in chronic obstructive pulmonary disease. *Curr Med Chem* 2022; 29:2385-98.

## **Pie de Figura**

Figura 1. Esquema de las vías y moléculas más relevantes que los estudios metabolómicos han relacionado con EPOC, sus fenotipos y otras circunstancias asociadas a la enfermedad (detalles en tablas 2 y 3).



**Tabla 1. Técnicas más usadas en los estudios metabolómicos**

| SEPARACION DE ANALITOS                      | IDENTIFICACIÓN – CUANTIFICACIÓN                      |
|---------------------------------------------|------------------------------------------------------|
| Cromatografía de Gases (GC)                 | Espectrometría de Masas (MS)                         |
| Cromatografía Líquida (LC)                  | - MS de ionización por electropulverización (ESI-MS) |
| - LC de alta presión (HPLC)                 | - MS de cuadruple tiempo de vuelo (QTOF-MS)          |
| * HPLC de ultra-elevado rendimiento (UHPLC) | Espectrometría de Resonancia Magnética (MS-NMR)      |
| Electroforesis Capilar (EC)                 |                                                      |
|                                             | Espectrometría de Masas (MS)                         |

## Tabla 2. Asociaciones más relevantes de metabolitos relacionados con la EPOC

### AMINOÁCIDOS y derivados<sup>16,24,26,28,33,36,41,42,43,48,56,58,60,61,63,64,66,67,70,71,72</sup>

Alanina (s)<sup>71,72</sup> (o ↑)<sup>73</sup>  
Arginina (s ↑)<sup>58,63,64</sup>  
Asparagina (s ↓)<sup>70</sup>  
Cisteína (BAL)<sup>28</sup> (s ALT)<sup>71,72</sup>  
Citrulina (s ↑)<sup>66</sup>  
Fenilalanina (s ↑)<sup>26,58,62,66</sup>  
Glicina (s ↓)<sup>60,62</sup> (BAL ↓)<sup>28</sup> – dimetilglicina (s ↓)<sup>26,66</sup>  
Glutamina (s ↑)<sup>26,62,66,70</sup> (cae ↓)<sup>41</sup> – Glutamato (s ↑-↓)<sup>58</sup>  
Histidina - metilhistidina (s ↑-↓)<sup>26,60,62,66,71,72</sup> (o ↑)<sup>73</sup>  
Homocisteína (BAL ↓)<sup>28</sup>  
Isoleucina (s ↓m)<sup>26,66</sup>  
Leucina (s ↓m)<sup>26,61,66</sup>  
Lisina (s ALT)<sup>33,57</sup> (cae ↓)<sup>43</sup>  
Metionina (s ALT)<sup>71,72</sup>  
Ornitina (s ↑-↓)<sup>66</sup>  
Prolina (s ↓)<sup>60</sup> (cae ↑)<sup>43</sup>  
Serina (cae ↑)<sup>43</sup>  
Tirosina (s ↑)<sup>67</sup> - Tironina (cae ↑)<sup>43</sup>  
Treonina (s ↓)<sup>60</sup> (BAL ↓)<sup>28</sup>  
Triptófano (e)<sup>36</sup>  
Valina (s ↓m)<sup>26,61,66</sup> (cae ↓)<sup>43</sup>

Ácido metilisobutírico – metilisobutarato [de leucina] (nose ↑)<sup>48</sup>  
Acetilpiridina [de triptófano] (nose ↓)<sup>48</sup>  
Ácido ciesteinsulfónico [oxidación de la cisteína] (s ↑)<sup>16</sup>  
Carnitinas y Acilcarnitinas [derivadas de lisina-metionina] (s ↑)<sup>24,56,58,67</sup>  
Carnosina (o ↑)<sup>73</sup>  
Creatina [de glicina y arginina] (s ↓)<sup>60</sup> y Creatinina (s ↑)<sup>16</sup> (o ↓)<sup>73</sup>  
Glutation (e ↑)<sup>33</sup>

Hidroxifenil-lactato [deriva de tirosina] (s ↑)<sup>67</sup>

Histamina [amina derivada de la Histidina] (s ↑)<sup>60</sup>

## PROTEÍNAS, PÉPTIDOS y derivados<sup>16,31,32,34,65,67</sup>

Ciclooxigenasa-2 (e ↑)<sup>34</sup>

Citocromo P450 (BAL, ALT)<sup>31</sup>

Glicoproteína GlycA (s ↑)<sup>65</sup>

Lipooxigenasa -5 [5-LOX] (s ↓)<sup>31</sup>

Lipoproteínas HDL (s ↑)<sup>65</sup>

Metilurato (s ↑)<sup>67</sup>

Mieloperoxidasa [MPO] (e ↑)<sup>32</sup>

Péptido B del Fibrinógeno [mFPB] (s ↑m)<sup>16</sup>

Superóxido dismutasa [OD] (e ↑)<sup>32</sup>

## Metabolismo NICOTINAMIDA y ÁCIDO NICOTÍNICO<sup>28</sup>

Nicotinamida (o ↓)<sup>73</sup>

p-Cresol (BAL ↓)<sup>28</sup>

## LÍPIDOS y derivados<sup>24,26,28,29,31,32,34,37,41,42,43,44,53,54,55,56,57,58,59,62,65,66,67,70</sup>

### - Ácidos Grasos y relacionados<sup>24,31,34,37,42,43,44,53,54, 56 y 58,67</sup>

Ácido araquidónico [AA, ω-6] (e ↑)<sup>34</sup>

Ácido eicosatetranoico [ETA, ω3] (s ↓)<sup>31</sup>

Ácido eicosapentanoico [EPA, ω3] (e ↓)<sup>34</sup>

Ácido docosapentanoico [DPA, ω3] (e ↑)<sup>34</sup>

Ácido docosahexanoico [DHA, ω3] (s ↓)<sup>67</sup> (e ↓)<sup>34</sup>

Ácido hidroxihexadecatrienoico (HHTrE) (s ↓)<sup>31</sup>

Ácido láurico (s ↑)<sup>67</sup>

Ácido linoleico [LA, ω-6] (BAL ↑)<sup>31</sup> (e ↓)<sup>34</sup>

Ácido linolénico [ALA y GLA, ω-3] (e ↓)<sup>34</sup>

- Diglicéridos y Triglicéridos<sup>24,53,56,57,58</sup>

Diversos Diglicéridos, sin detallar (s ↑-↓)<sup>56,57,58</sup>

Diversos Triglicéridos, sin detallar (s ↑)<sup>24,53,57,58</sup>

- Glicerofosfolípidos<sup>16,24,26,28,32,41,53,54,56,57,58,59</sup>

Cardiolipina [un Fosfatidilglicerol] (BAL ↓)<sup>28</sup>

Fosfocolinas (s ↑-↓)<sup>24,26,53,54,57,58,59</sup>

Fosfatidilcolinas (BAL ALT)<sup>28</sup>(e)<sup>54,57</sup>

Lisofosfocolina (s ↑)<sup>58</sup> y Lisofosfatidilcolina (s ↑)<sup>58</sup>

Fosfatidiletanolaminas (BAL ALT)<sup>28</sup>

Fosfatidilserinas (BAL ALT)<sup>28</sup>

Fosforilcolina (cae ↓)<sup>41</sup>

Glicerofosfoinositol (s ↑)<sup>16</sup>

Glicerofosfocolina (s ↑)<sup>26</sup>

- Esfingolípidos<sup>28,29,53,54,55,56,59</sup>

Esfingomielina (s ↓)<sup>53,54,55</sup> (BAL ↓)<sup>28</sup>

Esfingosina-1-fosfato (tp ↑)<sup>29</sup>

- Ceramidas<sup>29,53,54,55,56</sup>

Ceramidas, sin detallar (s ↓)<sup>53,54,55,56</sup> (tp ↑)<sup>29</sup>

- Otros Eicosanoides<sup>24,31,37,53,54</sup>

Prostaglandina D2 [PGD2] (e ↑) - derivado tetranor-

PGDM (e ↓)<sup>37</sup>

Derivado tetranor de Prostaglandina E1 [PGE1]

[PGEM] (e ↓)<sup>37</sup>

Prostaglandina E2 [PGE2] (e ↑) - derivado tetranor

PGEM] (e ↓)<sup>37</sup>

Prostaglandina-*like* E2 [8-iso-PGE2] (e ↑)<sup>37</sup>

- Prostaglandina-*like* F2 $\alpha$  [8-iso-PGF2 $\alpha$ ] (e  $\uparrow$ )<sup>32,37</sup>
- Leucotrieno D4 [LTD4] (e  $\uparrow$ )<sup>37</sup>
- Leucotrieno E4 [LTE4] (e  $\uparrow$ )<sup>37</sup>
- Tromboxano D2 [11-dehidro-TBX2] (e  $\uparrow$ )<sup>37</sup>
  
- Esteroides modificados y derivados<sup>67</sup>
  - Colestenoato (s  $\uparrow$ )<sup>67</sup>
  - Sulfato de Androsterona (s  $\uparrow$ )<sup>67</sup>
  
- Cuerpos cetónicos o relacionados<sup>26,43,46,48,62,65,66</sup>
  - $\uparrow$ )<sup>26,73</sup>
  - Cuerpos cetónicos, sin detallar (s  $\uparrow$ )<sup>26,62,66</sup> (cae  $\uparrow$ )<sup>45,46</sup> (o  $\uparrow$ )<sup>26</sup>
  - Acetato  $\rightarrow$  Acetona (cae  $\uparrow$ )<sup>43</sup> (o  $\uparrow$ )<sup>26</sup>
  - Acetoacetato - Ácido acético (s  $\uparrow$ )<sup>65</sup>
  - Cetoglutarato (o  $\uparrow$ )<sup>26</sup>
  - Fednilacetoglicina (o  $\uparrow$ )<sup>26</sup>
  - Hexanona (cae  $\downarrow$ )<sup>46</sup> (nose  $\uparrow$ )<sup>48</sup>
  - Ciclopentanona (nose  $\uparrow$ )<sup>48</sup>
  
- GLÚCIDOS y derivados<sup>16</sup>
  - Ácido Siálico (e  $\uparrow$ )<sup>33</sup>
  - Mioinositol [Vit B8] (s  $\uparrow$ )<sup>16</sup>
  
- BASES NITROGENADAS y relacionados<sup>33,67</sup>
  - Adenina (e  $\uparrow$ )<sup>33</sup>
  - Hipoxantina y xantina ( $\uparrow$ s)<sup>67</sup> (e  $\uparrow$ )<sup>33</sup>

## NUCLEÓSIDOS y relacionados<sup>33,67</sup>

Adenosina - Metiltioadenosina (e ↑)<sup>33</sup>

Pseudouridina (s ↑)<sup>67</sup>

## ÁCIDOS y SALES, Ciclo del ácido cítrico (Krebs)<sup>16,41,42,43,68,69</sup>

Ácido acetoláctico - Acetolactato → Acetoína (cae ALT)<sup>42</sup>

Ácido fumárico-fumarato (s ↑m)<sup>16</sup>

Ácido láctico - Lactato (s ↑m)<sup>68,69</sup> (cae ↑)<sup>42,43</sup>

Ácido maleico - Maleato (s ↑m)<sup>68</sup>

Ácido pirúvico - Piruvato (s ↑)<sup>68,69</sup> (cae ↓)<sup>41</sup> (o ↑)<sup>26</sup>

Ácido propiónico - Propionato (cae ↑)<sup>42,43</sup>

Ácido succínico - Succinato (s ↑m)<sup>68</sup> (cae ↓)<sup>41</sup>

## ALDEHÍDOS y ACOHOLES<sup>42,4,45,48,67</sup>

Diversos Aldehídos, sin detallar (cae ↑)<sup>44</sup>

Acetaldehído [derivado del etanol] (nose ↑)<sup>48</sup>

Etanol (cae ALT)<sup>42</sup>

Glicerol (s ↑)<sup>67</sup> - Glicerato (s ↓)<sup>67</sup>

Propanol (cae ↓)<sup>45,46</sup> (nose ↑)<sup>48</sup>

## HIDROCARBUROS<sup>45,46,47,48</sup>

Benceno (cae ↓)<sup>45</sup> (cae ↑)<sup>47</sup>

Decanos (cae ↑)<sup>45</sup>

Heptatrieno (cae ↑)<sup>47</sup>

Hexano (cae ↓)<sup>45</sup> y Ciclohexano → Hexanona (cae ↑)<sup>46</sup>  
(nose ↑)<sup>48</sup>

Indol (cae ↓)<sup>47</sup>

Limonina (cae ↓)<sup>45</sup>

Octano (nose ↑)<sup>48</sup>

Penteno (cae ↓)<sup>45</sup> → Ciclopentanona (nose ↑)<sup>48</sup>

Tetradecano (nose ↓)<sup>48</sup>

Tolueno - Hidroxitolueno (cae ↑)<sup>47</sup>

#### MISCELÁNEA<sup>28,33,36,41,45,47,48,67,70</sup>

Acetato de Vinilo [VAM, xenobiótico] (cae ↑)<sup>47</sup>

Ácido Hidroxi-indolacético [HIAA] (e ↓)<sup>36</sup>

Colina (cae ↓)<sup>41</sup>

Dodecalactona (nose ↓)<sup>48</sup>

Serotonina (s ↑)<sup>67</sup>

Trimetilamina (s ↑)<sup>62</sup> (cae ↓)<sup>41</sup>

Vinilpirazina (nose ↓)<sup>48</sup>

**Pie de tabla:** Las flechas indican la mayor (↑) o menor (↓) concentración en los pacientes con EPOC respecto de los sujetos sanos. Cuando existen resultados contradictorios, se mantiene la flecha de mayor tamaño en la dirección reportada por más autores. Las referencias bibliográficas aparecen en cada molécula o grupo de moléculas en particular.

*Abreviaturas:* s, sangre (plasma o suero); o, orina; BAL, lavado broncoalveolar; cae, condensado de aire espirado; m, indica que es un predictor de mal pronóstico vital; e, esputo; nose, aire exhalado detectado por nariz electrónica; tp, tejido pulmonar; ALT, los autores no reportan la dirección de los cambios.

### Tabla 3. Asociaciones más relevantes de metabolitos sanguíneos con los fenotipos más aceptados descritos para la enfermedad

#### (a) ENFISEMA<sup>13,55,58,60,62,66,78,79</sup>

AMINOÁCIDOS, PÉPTIDOS y derivados: *Arginina, Alanina, Asparagina, Citrulina, Fenilalanina, Glicina, Glutamina, Histidina, Lisina, Prolina, Serina, Tirosina, Triptófano y Valina*  
*Ácido aminoadípico y Aminoadipato (síntesis de Lisina), Betaina, Carnitina, Creatina, Piroglutamato y Sarcosina*

LÍPIDOS y derivados

- Ácidos grasos: *Ácido miristoleico*

- Diglicéridos: *Palmitil-linoleil-glicerol*

- Glicerofosfolípidos y derivados: *Estearoil-linoleil-glicosilfosfatidilinositol, Estearoil-araquidonil-glicosilfosfatidilinositol, Palmitoil-docosaexanoil-glicosilfosfatidiletanolamina y Palmitoil-linoleil-glicosilfosfatidilinositol,*

- Esfingomielinas

- Cuerpos cetónicos: *Hidroxibutirato*

GLÚCIDOS: *Glucosa*

BASES NITROGENADAS y derivados: *Adenina, Ácido aminoisobutírico (BAIBA, derivado de Tiamina)*

NUCLEÓSIDOS: *Ribosil-imidazolacetato*



**(b) BAJO PESO y CAQUEXIA<sup>62</sup>**

AMINOÁCIDOS, PÉPTIDOS, PROTEÍNAS y derivados: *Glutamina, Glicina, Isoleucina, Metionina y Valina*  
*Aminoisobutirato (catabolismo de Tiamina y Valina)*  
*Lipoproteínas HDL*

LÍPIDOS y Cuerpos Cetónicos: *Acetato, Hidroxibutirato*

GLÚCIDOS: *Glucosa*

ÁCIDOS Y SALES, Ciclo del ácido cítrico y/o  $\beta$ -oxidación lipídica: *Piruvato*

MISCELÁNEA: *Ácido Ascórbico y Ácido Nicotínico*

**(c) FENOTIPO de EXACERBADOR FRECUENTE<sup>14,15,55,83</sup>**

AMINOÁCIDOS, PÉPTIDOS y derivados: *Alanina, Arginina, Leucina, Isoleucina, Prolina, Serina, Treonina, Triptófano y Valina*  
*Betaína y Aminoacil-ARNt*

**(d) FENOTIPO EOSINOFÍLICO y SÍNDROME DE INTERPOSICIÓN EPOC-ASMA (ACO)<sup>89,92</sup>**

AMINOÁCIDOS, PÉPTIDOS, PROTEÍNAS y derivados: *Glutamina-Glutamato, Serina, Treonina y Valina*  
*Betaina, IL-1 $\beta$ , IL-5, IL-6, IFN- $\gamma$ , TGF- $\beta$  y TNF $\alpha$*

LÍPIDOS

- Ácidos grasos: *Ácido esteárico (octodecanoico) y Ácido linoleico*
  
- Triglicéridos: *Palmitoilglicerol*
  
- Eicosanoides: *Diversos*
  
- Esteroides modificados y derivados: *Colesterol*

GLÚCIDOS: *D-Manosa, Glucosa*

ÁCIDOS Y SALES, Ciclo del ácido cítrico: *Ácido cítrico- Citrato, Ácido láctico- Lactato, y Ácido succínico- Succinato*

ALCOHOLES / AMINAS: *Etanolamina*

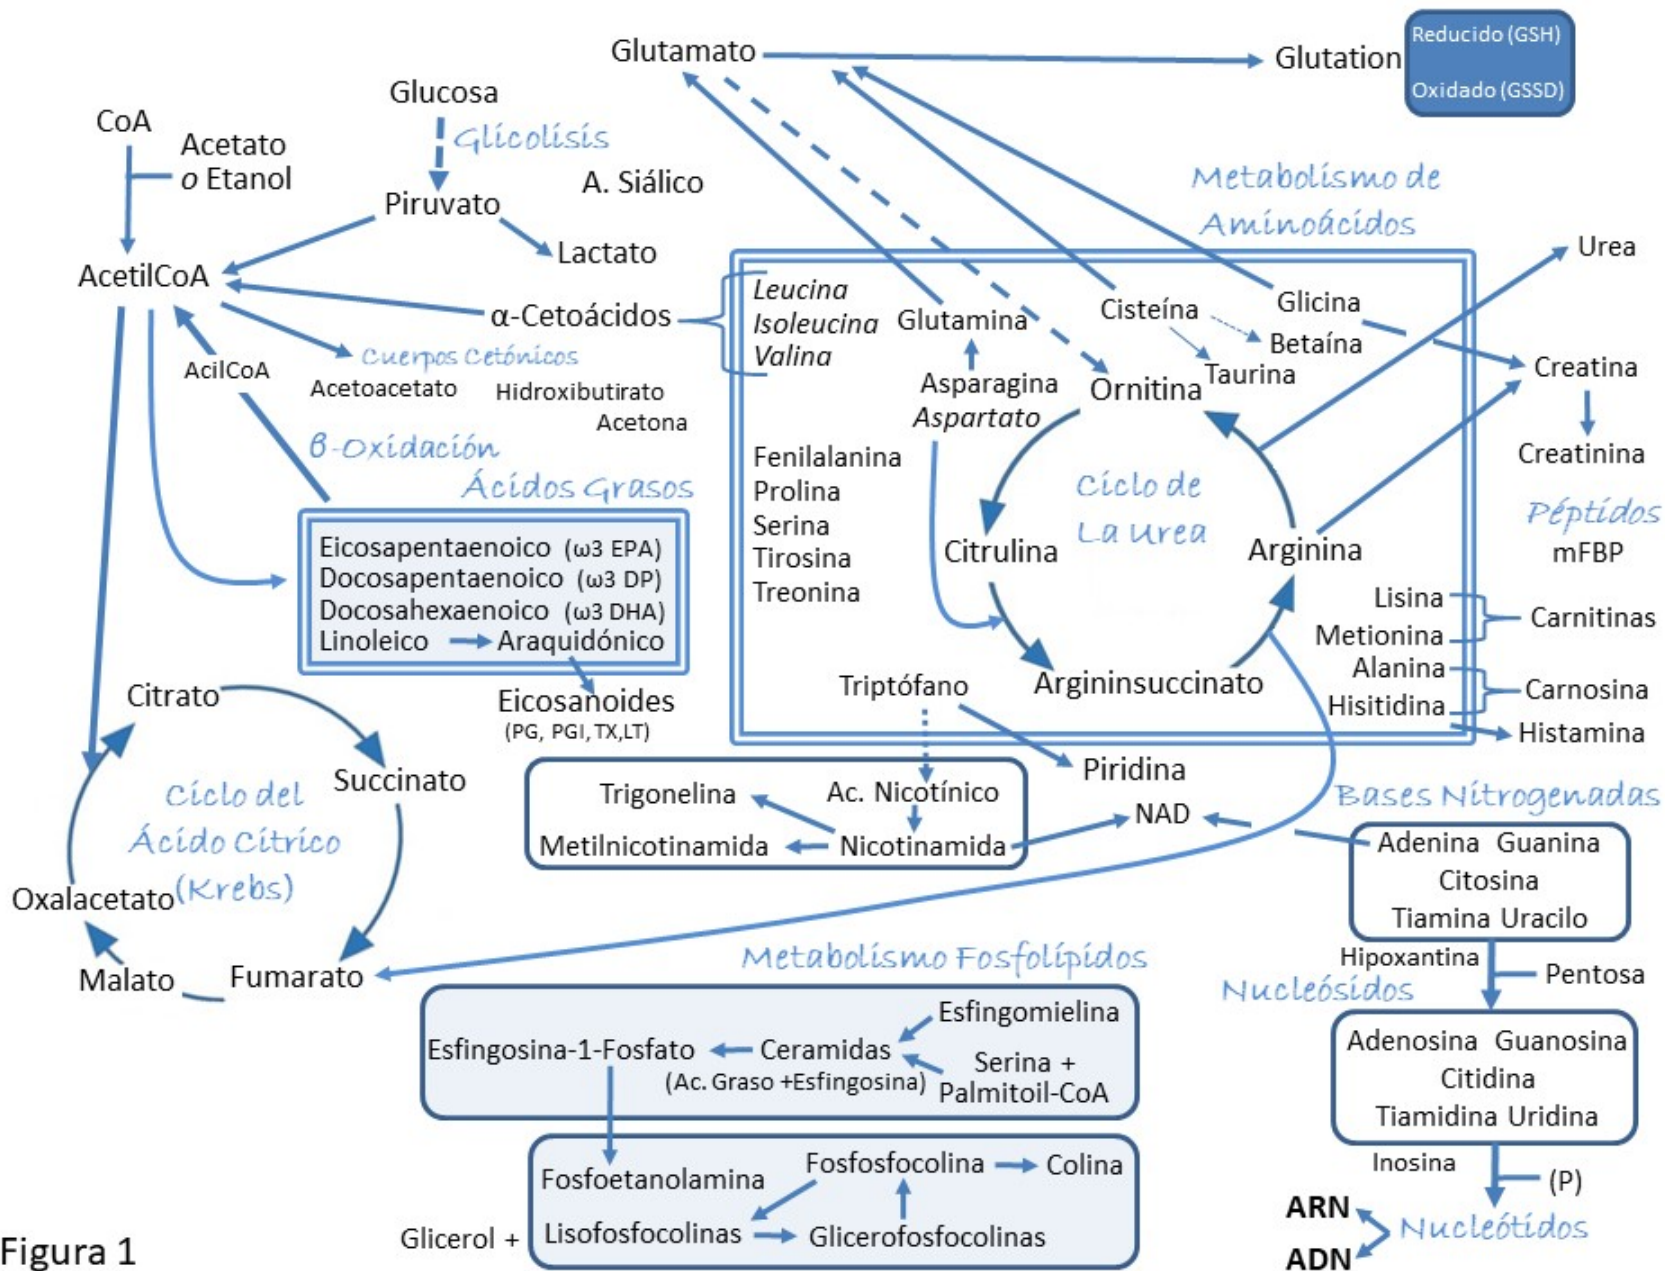

Figura 1
